# Supplementary material for: Low‐Carbohydrate Diets and Risk of Incident Atrial Fibrillation: A Prospective Cohort Study
Source: PubMed Central journal article supplement — J Am Heart Assoc. 2019 Apr 25;8(9):e011955. doi: 10.1161/JAHA.119.011955 (PMC6512089; doi:10.1161/jaha.119.011955), 2019-04-25
Supplement: JAH3-8-e011955-s001.pdf [file JAH3-8-e011955-s001.pdf]

# **SUPPLEMENTAL MATERIAL**

**Table S1 Criteria for determining the low-carbohydrate-diet scores.**

| Points               | Carbohydrate Intake | Animal-Protein Intake | Animal-Fat Intake | Vegetable-Protein Intake | Vegetable-Fat Intake |
|----------------------|---------------------|-----------------------|-------------------|--------------------------|----------------------|
| percentage of energy |                     |                       |                   |                          |                      |
| 0                    | >61.3               | ≤8.2                  | ≤12.0             | ≤3.0                     | ≤6.6                 |
| 1                    | 57.1-61.3           | 8.2-9.7               | 12.0-14.3         | 3.0-3.4                  | 6.6-8.3              |
| 2                    | 54.0-57.1           | 9.7-10.8              | 14.3-16.0         | 3.4-3.7                  | 8.3-9.7              |
| 3                    | 51.7-54.0           | 10.8-11.8             | 16.0-17.6         | 3.7-3.9                  | 9.7-10.9             |
| 4                    | 49.6-51.7           | 11.8-12.7             | 17.6-19.0         | 3.9-4.2                  | 10.9-12.0            |
| 5                    | 47.6-49.6           | 12.7-13.6             | 19.0-20.3         | 4.2-4.4                  | 12.0-13.1            |
| 6                    | 45.6-47.6           | 13.6-14.6             | 20.3-21.8         | 4.4-4.7                  | 13.1-14.3            |
| 7                    | 43.3-45.6           | 14.6-15.7             | 21.8-23.4         | 4.7-5.1                  | 14.3-15.6            |
| 8                    | 40.6-43.3           | 15.7-17.0             | 23.4-25.3         | 5.1-5.5                  | 15.6-17.3            |
| 9                    | 36.6-40.6           | 17.0-19.2             | 25.3-28.4         | 5.5-6.1                  | 17.3-19.8            |
| 10                   | ≤36.6               | >19.2                 | >28.4             | >6.1                     | >19.8                |

**Table S2 Time varying sensitivity analysis for risk of incident AF for carbohydrate intake as a percentage of energy, excluding participants with missing dietary data in visit 3.**

| Carbohydrate intake<br>(% of energy) | Model 1*            |          | Model 2 <sup>†</sup> |          | Model 3 <sup>‡</sup> |          |
|--------------------------------------|---------------------|----------|----------------------|----------|----------------------|----------|
|                                      | HR                  | <i>P</i> | HR                   | <i>P</i> | HR                   | <i>P</i> |
|                                      | (95% CI)            |          | (95% CI)             |          | (95% CI)             |          |
| <b>Quartiles</b>                     |                     |          |                      |          |                      |          |
| Q1<br>(≤43.90)                       | 1.00<br>(reference) | -        | 1.00<br>(reference)  | -        | 1.00<br>(reference)  | -        |
| Q2<br>(43.90-49.15)                  | 0.83<br>(0.73-0.96) | 0.011    | 0.80<br>(0.69-0.93)  | 0.003    | 0.86<br>(0.74-0.99)  | 0.040    |
| Q3<br>(49.15-54.47)                  | 0.77<br>(0.67-0.89) | <0.001   | 0.72<br>(0.61-0.85)  | <0.001   | 0.78<br>(0.66-0.93)  | 0.005    |
| Q4<br>(≥54.47)                       | 0.74<br>(0.64-0.85) | <0.001   | 0.66<br>(0.53-0.81)  | <0.001   | 0.73<br>(0.60-0.90)  | 0.004    |
| Per 1 SD<br>(8.2%)                   | 0.90<br>(0.87-0.95) | <0.001   | 0.86<br>(0.79-0.93)  | <0.001   | 0.90<br>(0.83-0.98)  | 0.018    |

\*Adjusted for age, sex, race.

<sup>†</sup>Further adjusted for total energy intake, total fat intake as a percentage of energy, animal fat intake as a percentage of energy, total protein intake as a percentage of energy, animal protein intake as a percentage of energy, dietary fiber intake, glycemic index, glycemic load.

<sup>‡</sup>Further adjusted for BMI, smoking, drinking, education level, sport, physical activity, total cholesterol,

HDL-c, LDL-c, total triglycerides, creatinine, uric acid, hypertension, stroke, diabetes, coronary artery disease, heart failure.

AF = atrial fibrillation

**Table S3 Time varying sensitivity analysis for risk of incident AF for carbohydrate intake as a percentage of energy, replacing missing dietary information in visit 3 by data from visit 1.**

| Carbohydrate intake<br>(% of energy) | Model 1*            |          | Model 2 <sup>†</sup> |          | Model 3 <sup>‡</sup> |          |
|--------------------------------------|---------------------|----------|----------------------|----------|----------------------|----------|
|                                      | HR                  | <i>P</i> | HR                   | <i>P</i> | HR                   | <i>P</i> |
|                                      | (95% CI)            |          | (95% CI)             |          | (95% CI)             |          |
| <b>Quartiles</b>                     |                     |          |                      |          |                      |          |
| Q1<br>(≤43.69)                       | 1.00<br>(reference) | -        | 1.00<br>(reference)  | -        | 1.00<br>(reference)  | -        |
| Q2<br>(43.69-49.03)                  | 0.85<br>(0.75-0.97) | 0.014    | 0.81<br>(0.71-0.93)  | 0.003    | 0.88<br>(0.77-1.01)  | 0.070    |
| Q3<br>(49.03-54.58)                  | 0.80<br>(0.71-0.91) | 0.001    | 0.74<br>(0.63-0.87)  | <0.001   | 0.83<br>(0.71-0.97)  | 0.017    |
| Q4<br>(≥54.58)                       | 0.76<br>(0.67-0.87) | <0.001   | 0.67<br>(0.56-0.82)  | <0.001   | 0.75<br>(0.62-0.92)  | 0.006    |
| Per 1 SD<br>(8.6%)                   | 0.91<br>(0.87-0.96) | <0.001   | 0.86<br>(0.79-0.93)  | <0.001   | 0.90<br>(0.83-0.98)  | 0.017    |

\*Adjusted for age, sex, race.

<sup>†</sup>Further adjusted for total energy intake, total fat intake as a percentage of energy, animal fat intake as a percentage of energy, total protein intake as a percentage of energy, animal protein intake as a percentage of energy, dietary fiber intake, glycemic index, glycemic load.

<sup>‡</sup>Further adjusted for BMI, smoking, drinking, education level, sport, physical activity, total cholesterol,

HDL-c, LDL-c, total triglycerides, creatinine, uric acid, hypertension, stroke, diabetes, coronary artery disease, heart failure.

AF = atrial fibrillation

**Table S4 Risk of incident AF for carbohydrate intake as a percentage of energy, stratified by race**

| Carbohydrate intake<br>(% of energy) | Model 1 <sup>†</sup> |          | Model 2 <sup>‡</sup> |          | Model 3 <sup>§</sup> |          |
|--------------------------------------|----------------------|----------|----------------------|----------|----------------------|----------|
|                                      | HR                   | <i>P</i> | HR                   | <i>P</i> | HR                   | <i>P</i> |
|                                      | (95% CI)             |          | (95% CI)             |          | (95% CI)             |          |
| Black                                |                      |          |                      |          |                      |          |
| Quartiles                            |                      |          |                      |          |                      |          |
| Q1<br>(≤42.70)                       | 1.00<br>(reference)  | -        | 1.00<br>(reference)  | -        | 1.00<br>(reference)  | -        |
| Q2<br>(42.71-48.55)                  | 0.83<br>(0.61-1.13)  | 0.24     | 0.77<br>(0.53-1.11)  | 0.16     | 0.79<br>(0.55-1.15)  | 0.79     |
| Q3<br>(48.56-54.74)                  | 0.94<br>(0.70-1.26)  | 0.68     | 0.84<br>(0.54-1.32)  | 0.45     | 0.89<br>(0.57-1.41)  | 0.62     |
| Q4<br>(≥54.75)                       | 0.73<br>(0.54-0.99)  | 0.04     | 0.60<br>(0.32-1.14)  | 0.12     | 0.67<br>(0.34-1.29)  | 0.23     |
| White                                |                      |          |                      |          |                      |          |
| Quartiles                            |                      |          |                      |          |                      |          |
| Q1<br>(≤42.70)                       | 1.00<br>(reference)  | -        | 1.00<br>(reference)  | -        | 1.00<br>(reference)  | -        |
| Q2<br>(42.71-48.55)                  | 0.84<br>(0.73-0.97)  | 0.015    | 0.77<br>(0.65-0.91)  | 0.002    | 0.79<br>(0.67-0.93)  | 0.005    |
| Q3                                   | 0.82                 | 0.007    | 0.71                 | 0.001    | 0.74                 | 0.005    |

|                   |             |             |             |
|-------------------|-------------|-------------|-------------|
| (48.56-54.74)     | (0.72-0.95) | (0.58-0.87) | (0.60-0.91) |
| Q4                | 0.81        | 0.63        | 0.64        |
| (≥54.75)          | (0.70-0.94) | (0.47-0.83) | (0.48-0.85) |
| P for interaction | 0.628       | 0.643       | 0.735       |

<sup>†</sup>Adjusted for age, sex.

<sup>‡</sup>Further adjusted for total energy intake, total fat intake as a percentage of energy, animal fat intake as a percentage of energy, total protein intake as a percentage of energy, animal protein intake as a percentage of energy, dietary fiber intake, glycemic index, glycemic load.

<sup>§</sup>Further adjusted for BMI, smoking, drinking, education level, sport, physical activity, total cholesterol, HDL-c, LDL-c, triglycerides, creatinine, uric acid, hypertension, stroke, diabetes, coronary artery disease, heart failure.

AF = atrial fibrillation



**Table S5 Risk of incident AF for coronary intake as a percentage of energy, stratified by sex**

| Carbohydrate intake<br>(% of energy) | Model 1 <sup>†</sup> |          | Model 2 <sup>†</sup> |          | Model 3 <sup>§</sup> |          |
|--------------------------------------|----------------------|----------|----------------------|----------|----------------------|----------|
|                                      | HR                   | <i>P</i> | HR                   | <i>P</i> | HR                   | <i>P</i> |
|                                      | (95% CI)             |          | (95% CI)             |          | (95% CI)             |          |
| female                               |                      |          |                      |          |                      |          |
| Quartiles                            |                      |          |                      |          |                      |          |
| Q1<br>(≤42.70)                       | 1.00<br>(reference)  | -        | 1.00<br>(reference)  | -        | 1.00<br>(reference)  | -        |
| Q2<br>(42.71-48.55)                  | 0.73<br>(0.60-0.90)  | 0.003    | 0.67<br>(0.53-0.85)  | 0.001    | 0.67<br>(0.53-0.85)  | 0.001    |
| Q3<br>(48.56-54.74)                  | 0.87<br>(0.71-1.05)  | 0.137    | 0.74<br>(0.52-0.97)  | 0.030    | 0.76<br>(0.57-1.00)  | 0.050    |
| Q4<br>(≥54.75)                       | 0.78<br>(0.64-0.94)  | 0.010    | 0.59<br>(0.40-0.86)  | 0.007    | 0.59<br>(0.40-0.88)  | 0.010    |
| male                                 |                      |          |                      |          |                      |          |
| Quartiles                            |                      |          |                      |          |                      |          |
| Q1<br>(≤42.70)                       | 1.00<br>(reference)  | -        | 1.00<br>(reference)  | -        | 1.00<br>(reference)  | -        |
| Q2<br>(42.71-48.55)                  | 0.92<br>(0.78-1.09)  | 0.335    | 0.86<br>(0.70-1.04)  | 0.116    | 0.88<br>(0.73-1.08)  | 0.223    |
| Q3                                   | 0.82                 | 0.023    | 0.72                 | 0.010    | 0.75                 | 0.027    |

|                   |             |             |             |      |       |
|-------------------|-------------|-------------|-------------|------|-------|
| (48.56-54.74)     | (0.69-0.97) | (0.56-0.92) | (0.58-0.97) |      |       |
| Q4                | 0.79        | 0.64        | 0.013       | 0.65 | 0.022 |
| (≥54.75)          | (0.66-0.95) | (0.45-0.91) | (0.45-0.94) |      |       |
| P for interaction | 0.162       | 0.154       | 0.075       |      |       |

<sup>†</sup>Adjusted for age, race.

<sup>‡</sup>Further adjusted for total energy intake, total fat intake as a percentage of energy, animal fat intake as a percentage of energy, total protein intake as a percentage of energy, animal protein intake as a percentage of energy, dietary fiber intake, glycemic index, glycemic load.

<sup>§</sup>Further adjusted for BMI, smoking, drinking, education level, sport, physical activity, total cholesterol, HDL-c, LDL-c, triglycerides, creatinine, uric acid, hypertension, stroke, diabetes, coronary artery disease, heart failure.

AF = atrial fibrillation

**Table S6 Risk of incident AF for coronary intake as a percentage of energy, stratified by age**

| Carbohydrate intake<br>(% of energy) | Model 1 <sup>†</sup>    |          | Model 2 <sup>‡</sup>    |          | Model 3 <sup>§</sup>    |          |
|--------------------------------------|-------------------------|----------|-------------------------|----------|-------------------------|----------|
|                                      | HR                      | <i>P</i> | HR                      | <i>P</i> | HR                      | <i>P</i> |
|                                      | (95% CI)                |          | (95% CI)                |          | (95% CI)                |          |
| Age <51                              |                         |          |                         |          |                         |          |
| Quartiles                            |                         |          |                         |          |                         |          |
| Q1<br>(≤42.70)                       | 1.00<br>(reference)     | -        | 1.00<br>(reference)     | -        | 1.00<br>(reference)     | -        |
| Q2<br>(42.71-48.55)                  | 0.88<br>(0.64-1.21)     | 0.43     | 0.90<br>(0.62-1.31)     | 0.58     | 0.94<br>(0.64-1.38)     | 0.74     |
| Q3<br>(48.56-54.74)                  | 0.96<br>(0.71-1.31)     | 0.80     | 1.04<br>(0.65-1.65)     | 0.88     | 1.09<br>(0.67-1.77)     | 0.73     |
| Q4<br>(≥54.75)                       | 0.84<br>(0.61-1.17)     | 0.30     | 1.00<br>(0.52-1.94)     | 1.00     | 0.97<br>(0.49-1.91)     | 0.92     |
| 51 ≤ Age <57                         |                         |          |                         |          |                         |          |
| Quartiles                            |                         |          |                         |          |                         |          |
| Q1<br>42.70                          | ≤ 1.00<br>(reference)   | -        | 1.00<br>(reference)     | -        | 1.00<br>(reference)     | -        |
| Q2<br>42.71-<br>48.55                | 0.84<br>(0.66-<br>1.07) | 0.158    | 0.86<br>(0.65-<br>1.15) | 0.314    | 0.85<br>(0.64-<br>1.13) | 0.267    |
| Q3<br>48.56-<br>54.75                | 0.97<br>(0.77-<br>1.17) | 0.798    | 1.03<br>(0.73-<br>1.38) | 0.850    | 1.12<br>(0.79-<br>1.65) | 0.522    |

|                   |             |              |             |              |             |              |
|-------------------|-------------|--------------|-------------|--------------|-------------|--------------|
| 54.74             | 1.23)       |              | 1.46)       |              | 1.59)       |              |
| Q4                | ≥ 0.81      | (0.63- 0.087 | 0.86        | (0.53- 0.562 | 0.95        | (0.57- 0.841 |
| 54.75             | 1.03)       |              | 1.42)       |              | 1.58)       |              |
| Age ≥ 57          |             |              |             |              |             |              |
| Quartiles         |             |              |             |              |             |              |
| Q1                | 1.00        | -            | 1.00        | -            | 1.00        | -            |
| (≤42.70)          | (reference) |              | (reference) |              | (reference) |              |
| Q2                | 0.84        | 0.043        | 0.70        | <0.001       | 0.73        | 0.002        |
| (42.71-48.55)     | (0.71-1.00) |              | (0.58-0.86) |              | (0.60-0.89) |              |
| Q3                | 0.78        | 0.005        | 0.58        | <0.001       | 0.59        | <0.001       |
| (48.56-54.74)     | (0.66-0.93) |              | (0.45-0.73) |              | (0.46-0.76) |              |
| Q4                | 0.78        | 0.005        | 0.47        | <0.001       | 0.47        | <0.001       |
| (≥54.75)          | (0.65-0.93) |              | (0.33-0.66) |              | (0.33-0.67) |              |
| P for interaction | 0.778       |              | 0.777       |              | 0.578       |              |

<sup>†</sup>Adjusted for gender, race.

<sup>‡</sup>Further adjusted for total energy intake, total fat intake as a percentage of energy, animal fat intake as a percentage of energy, total protein intake as a percentage of energy, animal protein intake as a percentage of energy, dietary fiber intake, glycemic index, glycemic load.

<sup>§</sup>Further adjusted for BMI, smoking, drinking, education level, sport, physical activity, total cholesterol, HDL-c, LDL-c, triglycerides, creatinine, uric acid, hypertension, stroke, diabetes, coronary artery disease, heart failure.

AF = atrial fibrillation

**Table S7 Risk of incident AF for coronary intake as a percentage of energy, stratified by hypertension.**

| Carbohydrate intake<br>(% of energy) | Model 1 <sup>†</sup> |          | Model 2 <sup>‡</sup> |          | Model 3 <sup>§</sup> |          |
|--------------------------------------|----------------------|----------|----------------------|----------|----------------------|----------|
|                                      | HR                   | <i>P</i> | HR                   | <i>P</i> | HR                   | <i>P</i> |
|                                      | (95% CI)             |          | (95% CI)             |          | (95% CI)             |          |
| Hypertension                         |                      |          |                      |          |                      |          |
| Quartiles                            |                      |          |                      |          |                      |          |
| Q1<br>(≤42.70)                       | 1.00<br>(reference)  | -        | 1.00<br>(reference)  | -        | 1.00<br>(reference)  | -        |
| Q2<br>(42.71-48.55)                  | 0.88<br>(0.73-1.06)  | 0.17     | 0.80<br>(0.64-0.99)  | 0.043    | 0.76<br>(0.61-0.96)  | 0.018    |
| Q3<br>(48.56-54.74)                  | 0.77<br>(0.64-0.94)  | 0.009    | 0.66<br>(0.50-0.87)  | 0.003    | 0.64<br>(0.48-0.85)  | 0.002    |
| Q4<br>(≥54.75)                       | 0.69<br>(0.56-0.83)  | <0.001   | 0.52<br>(0.35-0.78)  | 0.001    | 0.49<br>(0.33-0.73)  | <0.001   |
| Free from hypertension               |                      |          |                      |          |                      |          |
| Quartiles                            |                      |          |                      |          |                      |          |
| Q1<br>(≤42.70)                       | 1.00<br>(reference)  | -        | 1.00<br>(reference)  | -        | 1.00<br>(reference)  | -        |
| Q2<br>(42.71-48.55)                  | 0.82<br>(0.68-0.97)  | 0.022    | 0.77<br>(0.63-0.94)  | 0.012    | 0.79<br>(0.65-0.97)  | 0.026    |
| Q3                                   | 0.90                 | 0.250    | 0.83                 | 0.135    | 0.89                 | 0.367    |

|                   |             |       |             |       |             |
|-------------------|-------------|-------|-------------|-------|-------------|
| (48.56-54.74)     | (0.76-1.07) |       | (0.65-1.00) |       | (0.69-1.15) |
| Q4                | 0.87        |       | 0.76        |       | 0.82        |
| ( $\geq 54.75$ )  | (0.73-1.04) | 0.134 | (0.54-1.08) | 0.121 | (0.57-1.17) |
| P for interaction | 0.098       |       | 0.098       |       | 0.094       |

<sup>†</sup>Adjusted for gender, race, age

<sup>‡</sup>Further adjusted for total energy intake, total fat intake as a percentage of energy, animal fat intake as a percentage of energy, total protein intake as a percentage of energy, animal protein intake as a percentage of energy, dietary fiber intake, glycemic index, glycemic load.

<sup>§</sup>Further adjusted for BMI, smoking, drinking, education level, sport, physical activity, total cholesterol, HDL-c, LDL-c, triglycerides, creatinine, uric acid, stroke, diabetes, coronary artery disease, heart failure.

AF = atrial fibrillation

**Table S8 Risk of incident AF for carbohydrate intake as a percentage of energy, excluded of patients with cardiovascular disease or diabetes.**

| Carbohydrate intake<br>(% of energy) | Model 1 <sup>†</sup> |          | Model 2 <sup>‡</sup> |          | Model 3 <sup>§</sup> |          |
|--------------------------------------|----------------------|----------|----------------------|----------|----------------------|----------|
|                                      | HR                   | <i>P</i> | HR                   | <i>P</i> | HR                   | <i>P</i> |
|                                      | (95% CI)             |          | (95% CI)             |          | (95% CI)             |          |
| Quartiles                            |                      |          |                      |          |                      |          |
| Q1<br>(≤42.70)                       | 1.00<br>(reference)  | -        | 1.00<br>(reference)  | -        | 1.00<br>(reference)  | -        |
| Q2<br>(42.71-48.55)                  | 0.84<br>(0.72-0.97)  | 0.021    | 0.77<br>(0.65-0.92)  | 0.003    | 0.79<br>(0.66-0.94)  | 0.009    |
| Q3<br>(48.56-54.74)                  | 0.84<br>(0.72-0.98)  | 0.024    | 0.73<br>(0.59-0.91)  | 0.005    | 0.76<br>(0.61-0.94)  | 0.013    |
| Q4<br>(≥54.75)                       | 0.78<br>(0.67-0.91)  | 0.002    | 0.61<br>(0.45-0.83)  | 0.002    | 0.64<br>(0.46-0.87)  | 0.005    |
| Per 1 SD<br>(9.3%)                   | 0.92<br>(0.87-0.98)  | 0.006    | 0.77<br>(0.66-0.89)  | 0.001    | 0.79<br>(0.68-0.93)  | 0.005    |

<sup>†</sup>Adjusted for age, sex, race.

<sup>‡</sup>Further adjusted for total energy intake, total fat intake as a percentage of energy, animal fat intake as a percentage of energy, total protein intake as a percentage of energy, animal protein intake as a percentage of energy, dietary fiber intake, glycemic index, glycemic load.

<sup>§</sup>Further adjusted for BMI, smoking, drinking, education level, sport, physical activity, total cholesterol, HDL-c, LDL-c, triglycerides, creatinine, uric acid, hypertension.

AF = atrial fibrillation



**Table S9 Risk of incident AF for animal-based low-carbohydrate diet scores**

| Low-carbohydrate diet scores | Model 1 <sup>†</sup> |          | Model 2 <sup>‡</sup> |          | Model 3 <sup>§</sup> |          |
|------------------------------|----------------------|----------|----------------------|----------|----------------------|----------|
|                              | HR<br>(95% CI)       | <i>P</i> | HR<br>(95% CI)       | <i>P</i> | HR<br>(95% CI)       | <i>P</i> |
| Quartiles                    |                      |          |                      |          |                      |          |
| Q1<br>(≤9)                   | 1.00<br>(reference)  | -        | 1.00<br>(reference)  | -        | 1.00<br>(reference)  | -        |
| Q2<br>(10-15)                | 1.05<br>(0.92-1.19)  | 0.472    | 1.04<br>(0.89-1.22)  | 0.631    | 1.05<br>(0.89-1.24)  | 0.563    |
| Q3<br>(16-21)                | 0.94<br>(0.82-1.07)  | 0.340    | 0.93<br>(0.75-1.16)  | 0.531    | 0.94<br>(0.76-1.16)  | 0.543    |
| Q4<br>(22-30)                | 1.18<br>(1.04-1.33)  | 0.011    | 1.17<br>(0.87-1.58)  | 0.295    | 1.17<br>(0.87-1.58)  | 0.302    |
| Continuous                   | 1.01<br>(1.00-1.01)  | 0.051    | 1.01<br>(0.98-1.04)  | 0.984    | 1.01<br>(0.99-1.04)  | 0.442    |

<sup>†</sup>Adjusted for age, sex, race.

<sup>‡</sup>Further adjusted for total energy intake, total fat intake as a percentage of energy, animal fat intake as a percentage of energy, total protein intake as a percentage of energy, animal protein intake as a percentage of energy, dietary fiber intake, glycemic index, glycemic load.

<sup>§</sup>Further adjusted for BMI, smoking, drinking, education level, sport, physical activity, total cholesterol, HDL-c, LDL-c, triglycerides, creatinine, uric acid, hypertension.

AF = atrial fibrillation

**Table S10 Risk of incident AF for plant-based low-carbohydrate diet scores**

| Low-carbohydrate diet scores | Model 1 <sup>†</sup> |          | Model 2 <sup>‡</sup> |          | Model 3 <sup>§</sup> |          |
|------------------------------|----------------------|----------|----------------------|----------|----------------------|----------|
|                              | HR                   | <i>P</i> | HR                   | <i>P</i> | HR                   | <i>P</i> |
|                              | (95% CI)             |          | (95% CI)             |          | (95% CI)             |          |
| Quartiles                    |                      |          |                      |          |                      |          |
| Q1                           | 1.00                 | -        | 1.00                 | -        | 1.00                 | -        |
| (≤11)                        | (reference)          |          | (reference)          |          | (reference)          |          |
| Q2                           | 0.95                 | 0.460    | 0.91                 | 0.220    | 0.92                 | 0.319    |
| (12-15)                      | (0.83-1.09)          |          | (0.77-1.06)          |          | (0.79-1.08)          |          |
| Q3                           | 1.05                 | 0.437    | 0.99                 | 0.939    | 1.01                 | 0.949    |
| (16-19)                      | (0.93-1.20)          |          | (0.82-1.20)          |          | (0.83-1.22)          |          |
| Q4                           | 1.14                 | 0.049    | 1.05                 | 0.700    | 1.04                 | 0.792    |
| (20-30)                      | (1.00-1.30)          |          | (0.81-1.37)          |          | (0.80-1.35)          |          |
| Continuous                   | 1.01                 | 0.026    | 1.00                 | 0.987    | 1.00                 | 0.772    |
|                              | (1.00-1.01)          |          | (0.97-1.03)          |          | (0.98-1.03)          |          |

<sup>†</sup>Adjusted for age, sex, race.

<sup>‡</sup>Further adjusted for total energy intake, carbohydrate intake as a percentage of energy, total fat intake as a percentage of energy, animal fat intake as a percentage of energy, total protein intake as a percentage of energy, animal protein intake as a percentage of energy, dietary fiber intake, glycemic index, glycemic load.

<sup>§</sup>Further adjusted for BMI, smoking, drinking, education level, sport, physical activity, total cholesterol,

HDL-c, LDL-c, triglycerides, creatinine, uric acid, hypertension.

AF = atrial fibrillation
